# Supplementary material
Source: PubMed Central journal article supplement (PMC5590569)
Supplement: tpmd160728.SD1.pdf [file tpmd160728.SD1.pdf]

SUPPLEMENTAL APPENDIX TABLE 1  
Background characteristics associated with fecal sampling procedure compliance

|                                       | Children who submitted two samples (N = 4,985) | Children who submitted one sample (N = 1,552) | Difference test (P value) |
|---------------------------------------|------------------------------------------------|-----------------------------------------------|---------------------------|
|                                       | Mean (95% CI)                                  | Mean (95% CI)                                 |                           |
| <b>Individual characteristics</b>     |                                                |                                               |                           |
| Age, years                            | 11.11 (11.08, 11.14)                           | 11.13 (11.08, 11.18)                          | 0.708                     |
| Female (%)                            | 46.42 (45.03, 47.80)                           | 43.04 (40.58, 45.51)                          | 0.1239                    |
| Boarding at school (%)                | 30.07 (28.80, 31.34)                           | 23.21 (21.11, 25.31)                          | <b>0.0174*</b>            |
| Dong ethnic minority (%)              | 45.72 (44.33, 47.10)                           | 41.17 (38.72, 43.62)                          | 0.2689                    |
| Miao ethnic minority (%)              | 36.25 (34.91, 37.58)                           | 40.27 (37.83, 42.71)                          | 0.3016                    |
| Shui ethnic minority (%)              | 3.71 (3.19, 4.24)                              | 3.35 (2.45, 4.25)                             | 0.5726                    |
| Zhuang ethnic minority (%)            | 2.09 (1.69, 2.48)                              | 0.58 (0.2, 0.96)                              | 0.05                      |
| <b>Household characteristics</b>      |                                                |                                               |                           |
| Number of siblings                    | 1.24 (1.21, 1.27)                              | 1.31 (1.26, 1.36)                             | 0.0897                    |
| Pieces of durable assets              | 8.19 (8.10, 8.27)                              | 8.47 (8.31, 8.62)                             | <b>0.0382*</b>            |
| Parents are migrant workers (%)       | 30.73 (29.46, 32.01)                           | 34.16 (31.8, 36.52)                           | 0.0708                    |
| Mother attended secondary school (%)  | 6.97 (6.26, 7.67)                              | 7.79 (6.46, 9.12)                             | 0.3557                    |
| Father attended secondary school (%)  | 11.89 (11, 12.79)                              | 11.1 (9.54, 12.66)                            | 0.4696                    |
| <b>Sanitation and hygiene</b>         |                                                |                                               |                           |
| Washes hands before eating (%)        | 86.63 (85.68, 87.57)                           | 86.11 (84.39, 87.83)                          | 0.652                     |
| Washes hands after using toilet (%)   | 89.23 (88.37, 90.09)                           | 89.06 (87.51, 90.61)                          | 0.8678                    |
| Drinks boiled water only (%)          | 10.66 (9.80, 11.52)                            | 11.68 (10.09, 13.28)                          | 0.3768                    |
| Wears shoes while playing outside (%) | 35.41 (34.08, 36.74)                           | 37.76 (35.35, 40.18)                          | 0.1719                    |
| House has dirt floor (%)              | 13.69 (12.74, 14.65)                           | 11.99 (10.38, 13.6)                           | 0.1824                    |
| House has dirt-based latrine (%)      | 17.92 (16.85, 18.98)                           | 15.97 (14.15, 17.79)                          | 0.1522                    |
| Family uses feces as fertilizer (%)   | 68.05 (66.75, 69.34)                           | 64.54 (62.17, 66.92)                          | <b>0.0315*</b>            |

Bolded values with \* indicate significance at the 95% level.

SUPPLEMENTAL APPENDIX TABLE 2  
Observed infection prevalence and fecal egg counts from examination of a single smear slide vs. multiple smear slides (N = 989)

|                                             | Single slide           |                        | Multiple slides            |
|---------------------------------------------|------------------------|------------------------|----------------------------|
|                                             | Slide 1 only (95% CI)  | Slide 2 only (95% CI)  | Slides 1 + 2 (95% CI)      |
| <b>Infection prevalence (%)</b>             |                        |                        |                            |
| <i>Ascaris lumbricoides</i>                 | 17.3 (14.9, 19.7)      | 19.4 (16.9, 21.9)      | 22.5 (19.9, 25.2)          |
| <i>Trichuris trichiura</i>                  | 22.9 (20.2, 25.5)      | 24.5 (21.8, 27.2)      | 28.1 (25.3, 30.9)          |
| Hookworm                                    | 0.8 (0.2, 1.4)         | 0.2 (-0.1, 0.5)        | 1.0 (0.4, 1.6)             |
| At least one of the STH species             | 32.0 (29.0, 34.9)      | 34.8 (31.8, 37.8)      | 40.2 (37.2, 43.3)          |
| <b>Fecal egg count among infected (EPG)</b> |                        |                        |                            |
| <i>A. lumbricoides</i>                      | 850.2 (646.7, 1,053.7) | 913.2 (662.6, 1,163.7) | 1,438.2 (1,094.5, 1,781.8) |
| <i>T. trichiura</i>                         | 70.4 (52.7, 88.1)      | 60.6 (43.1, 78.2)      | 110.0 (83.1, 136.9)        |
| Hookworm                                    | 14.4 (0.8, 28.0)       | 87 (-929.5, 1,103.5)   | 28.9 (-7.3, 65.1)          |

CI = confidence interval; EPG = eggs per gram; STH = soil-transmitted helminth.
